# Supplementary material for: Discrepant Effects of Human Interferon-gamma on Clinical and Immunological Disease Parameters in a Novel Marmoset Model for Multiple Sclerosis
Source: PubMed Central journal article supplement — J Neuroimmune Pharmacol. 2011 Oct 20;7(1):253–65. doi: 10.1007/s11481-011-9320-5 (PMC3280389; doi:10.1007/s11481-011-9320-5), 2011-10-20

# Discrepant effects of human interferon-gamma on clinical and immunological disease parameters in a novel marmoset model for multiple sclerosis

Journal of Neuroimmune Pharmacology

S. Anwar Jagessar<sup>1,5</sup>, Bruno Gran<sup>2</sup>, Nicole Heijmans<sup>1</sup>, Jan Bauer<sup>3</sup>, Jon D Laman<sup>4,5</sup>, Bert A. 't Hart<sup>1,4,5</sup> and Cris S. Constantinescu<sup>2</sup>

<sup>1</sup>Department Immunobiology, Biomedical Primate Research Centre, Rijswijk – The Netherlands, <sup>2</sup>Academic Division of Clinical Neurology, University of Nottingham, United Kingdom, <sup>3</sup>Department of Neuroimmunology, Medical University Vienna, Center for Brain Research, Vienna, Austria, <sup>4</sup>Department Immunology, Erasmus Medical Center, Rotterdam, The Netherlands, <sup>5</sup>ErasMS Center for Translational research into MS, The Netherlands

Address correspondence to:

Prof. dr. Bert A. 't Hart

e-mail: hart@bprc.nl

## Supplemental Figure 2 IgG and IgM responses of individual monkeys

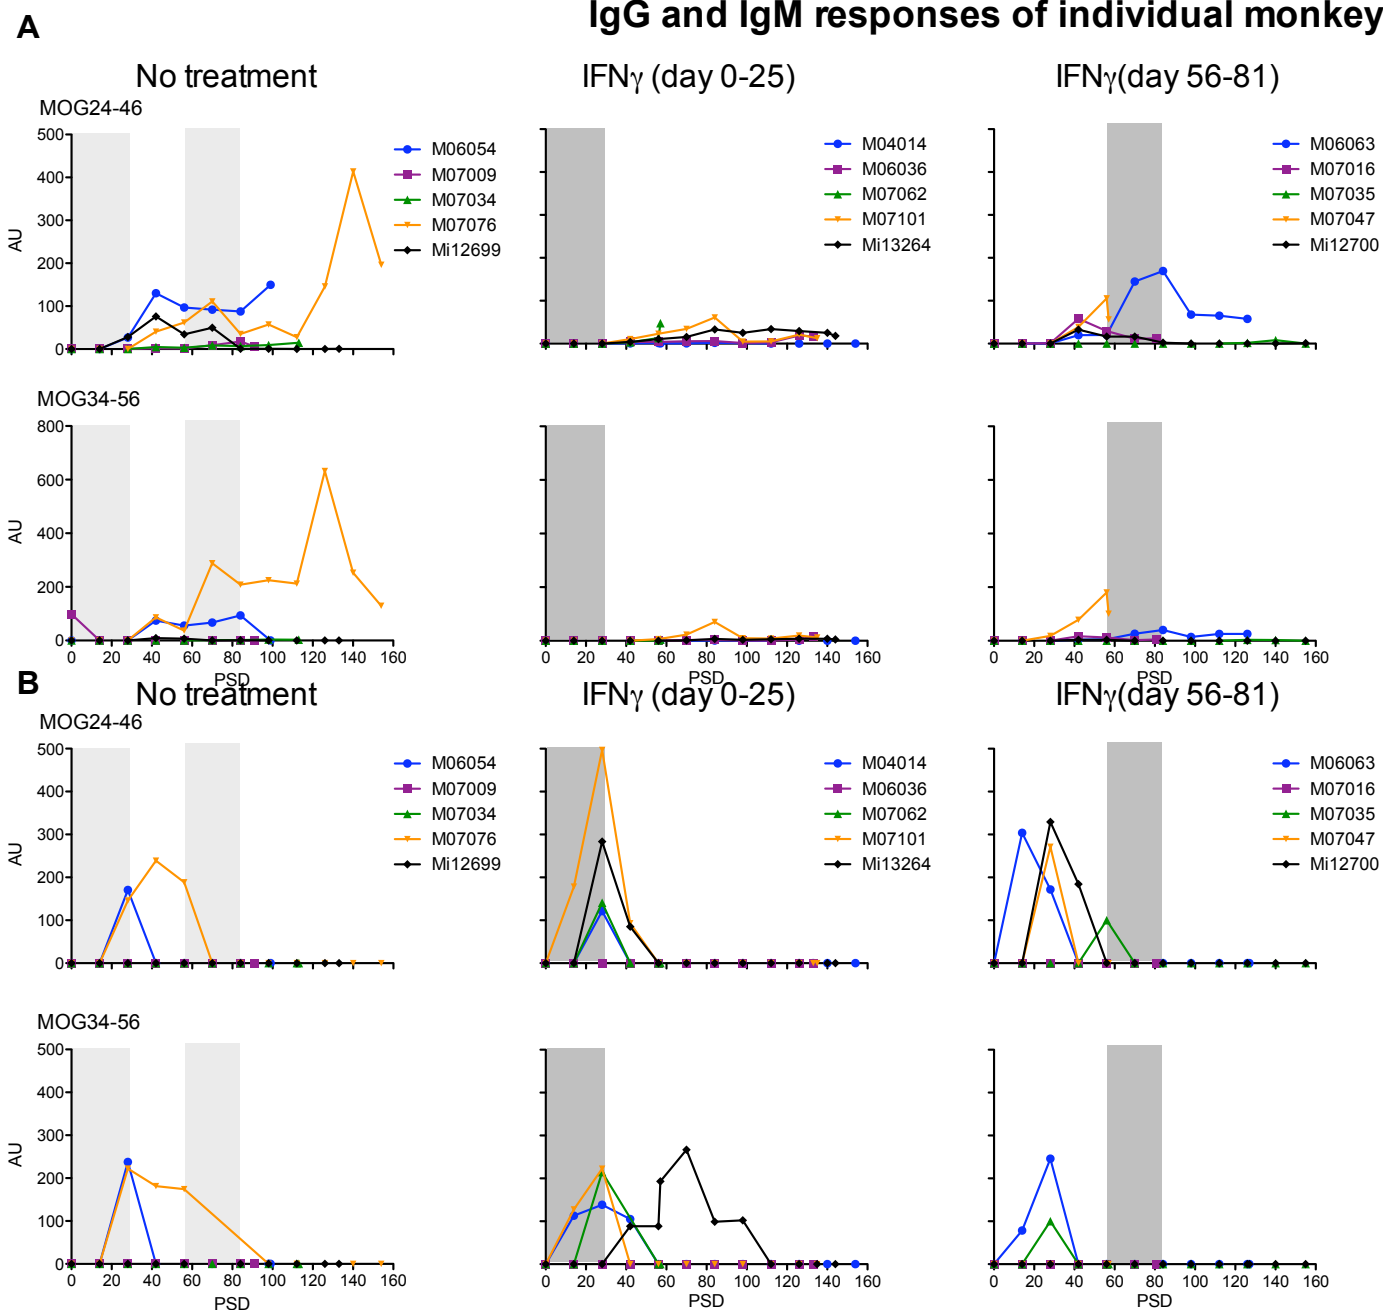

Supplement: 11481_2011_9320_MOESM2_ESM.pdf [file 11481_2011_9320_MOESM2_ESM.pdf]
